# Supplementary material for: Comparative Risk of Acute Kidney Injury Following Concurrent Administration of Vancomycin with Piperacillin/Tazobactam or Meropenem: A Systematic Review and Meta-Analysis of Observational Studies
Source: MDPI journal article supplement (doi:10.3390/antibiotics11040526), 2022-04-14
Supplement: s1 [file s1]

**Table S1.** Summary of inclusion criteria

|                                |                                                                                                                                                             |
|--------------------------------|-------------------------------------------------------------------------------------------------------------------------------------------------------------|
| <b>Study design</b>            | Observational studies                                                                                                                                       |
| <b>Population</b>              | Adult patients (age $\geq$ 18 years)<br>Hospitalized for at least 48 hours                                                                                  |
| <b>Intervention</b>            | Studies were included if they evaluated the use of the following treatments:<br>vancomycin/piperacillin-tazobactam (V+PT) versus vancomycin/meropenem (V+M) |
| <b>Primary Outcomes</b>        | Acute kidney injury (AKI)                                                                                                                                   |
| <b>Secondary Outcomes</b>      | Length of stay (LOS) in hospital<br>Renal replacement therapy (RRT)<br>Mortality                                                                            |
| <b>Language of publication</b> | Only English language publications                                                                                                                          |

**Table S2:** Newcastle–Ottawa scale for assessing the quality of included studies

| Study                        | Selection                                |                                     |                           |                                                                          | Comparability                                                   | Outcome               |                                                 |                                  | Score |
|------------------------------|------------------------------------------|-------------------------------------|---------------------------|--------------------------------------------------------------------------|-----------------------------------------------------------------|-----------------------|-------------------------------------------------|----------------------------------|-------|
|                              | Representativeness of the exposed cohort | Selection of the non-exposed cohort | Ascertainment of exposure | Demonstration that outcome of interest was not present at start of study | Comparability of cohorts on the basis of the design or analysis | Assessment of outcome | Was follow-up long enough for outcomes to occur | Adequacy of follow up of cohorts |       |
| Alyami, 2017                 | ✓                                        | ✓                                   | ✓                         | ✓                                                                        | ✓                                                               | ✓                     | ✓                                               | ✓                                | 8     |
| Rutter, 2019                 | ✓                                        | ✓                                   | ✓                         | ✓                                                                        | ✓✓                                                              | ✓                     | ✓                                               | ✓                                | 9     |
| Blevins, 2019                | -                                        | ✓                                   | ✓                         | ✓                                                                        | ✓✓                                                              | ✓                     | ✓                                               | ✓                                | 8     |
| Robertson, 2018              | ✓                                        | ✓                                   | ✓                         | ✓                                                                        | ✓✓                                                              | ✓                     | ✓                                               | ✓                                | 9     |
| Balci, 2018                  | ✓                                        | ✓                                   | ✓                         | ✓                                                                        | ✓✓                                                              | ✓                     | ✓                                               | ✓                                | 9     |
| Mullins, 2018                | ✓                                        | ✓                                   | ✓                         | ✓                                                                        | ✓✓                                                              | ✓                     | ✓                                               | ✓                                | 9     |
| Kang, 2019                   | -                                        | ✓                                   | ✓                         | ✓                                                                        | ✓✓                                                              | ✓                     | ✓                                               | ✓                                | 8     |
| Cannon, 2018                 | ✓                                        | ✓                                   | ✓                         | ✓                                                                        | ✓✓                                                              | ✓                     | ✓                                               | ✓                                | 9     |
| Schreier, 2019               | -                                        | ✓                                   | ✓                         | ✓                                                                        | ✓✓                                                              | ✓                     | ✓                                               | ✓                                | 8     |
| Ide, 2019                    | -                                        | ✓                                   | -                         | ✓                                                                        | ✓✓                                                              | ✓                     | ✓                                               | ✓                                | 7     |
| Rungkitwattanakul et al,2021 | ✓                                        | ✓                                   | ✓                         | ✓                                                                        | ✓                                                               | ✓                     | ✓                                               | ✓                                | 8     |
| Tookhi et al,2021            | ✓                                        | ✓                                   | ✓                         | ✓                                                                        | ✓✓                                                              | ✓                     | ✓                                               | ✓                                | 9     |

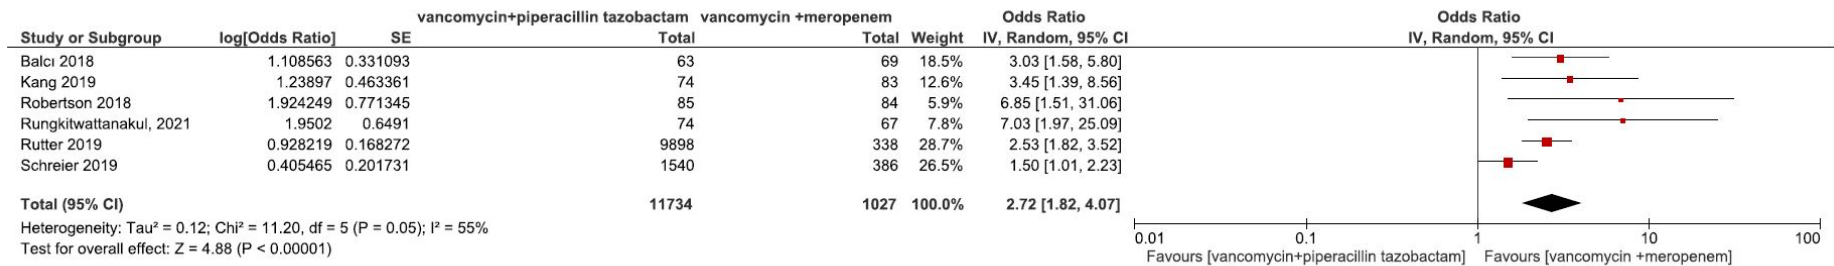

**Figure S1.** Acute kidney injury (AKI); pooled analysis of the adjusted odds ratio (aOR).

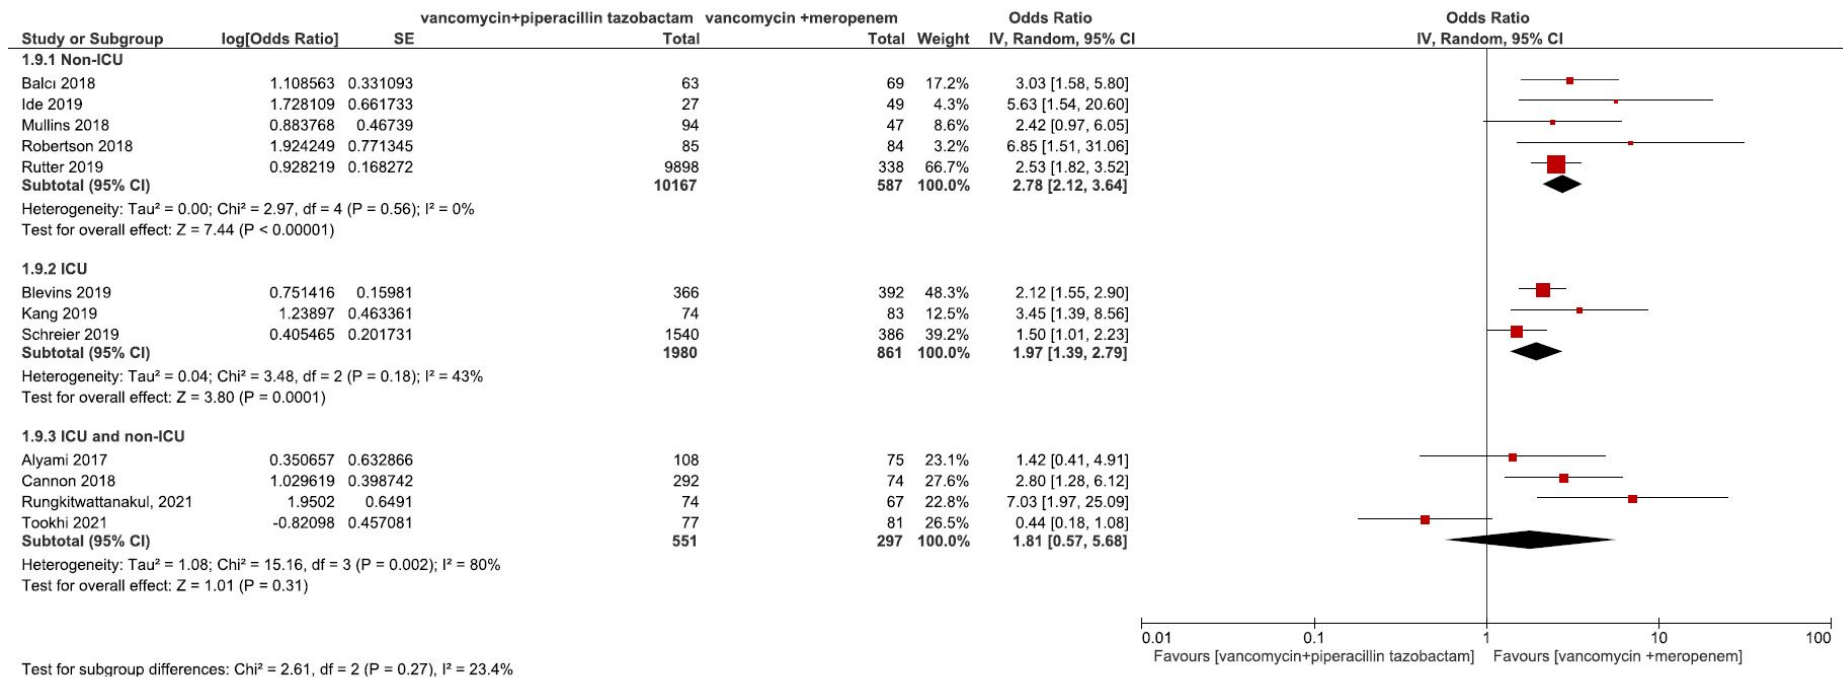

**Figure S2.** Acute kidney injury (AKI) based on clinical setting.

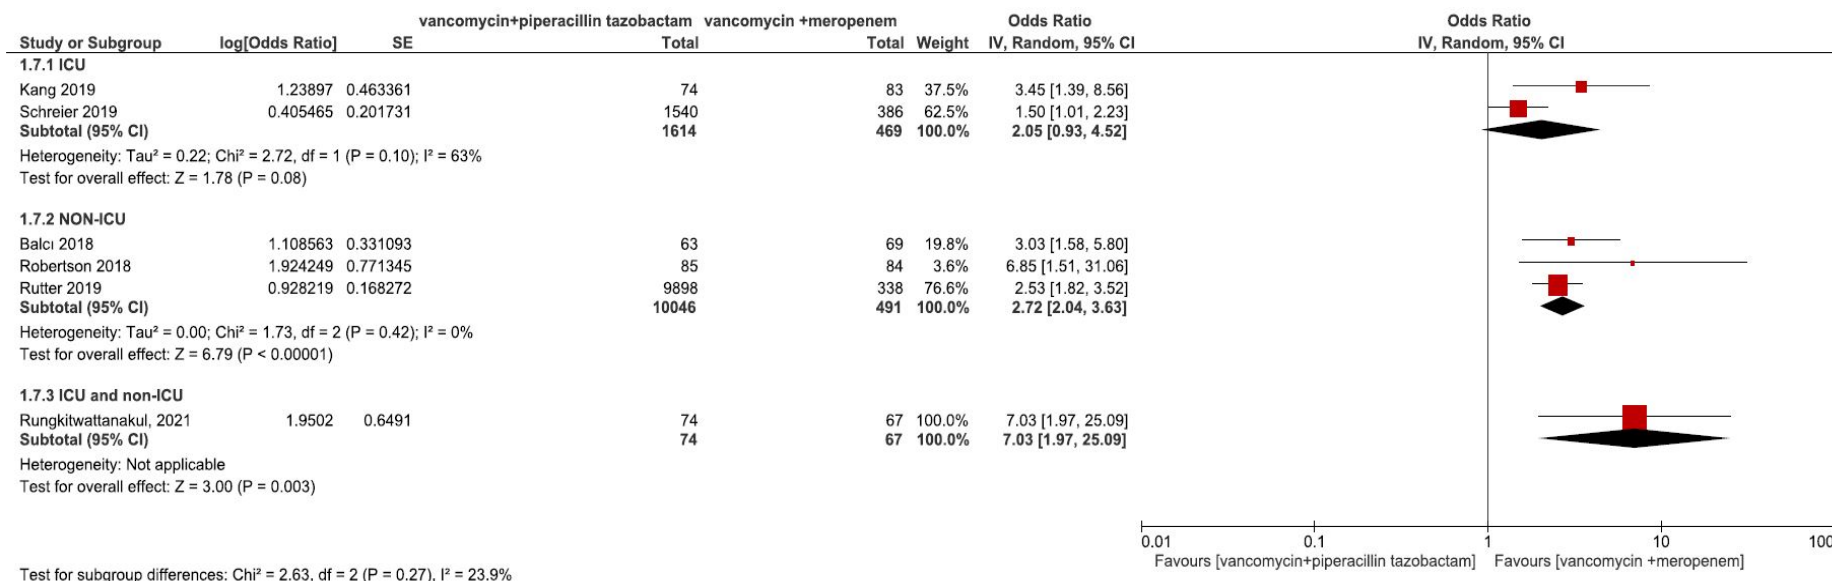

**Figure S3.** Acute kidney injury (AKI) based on clinical setting for studies reported adjusted analysis for potential confounders.

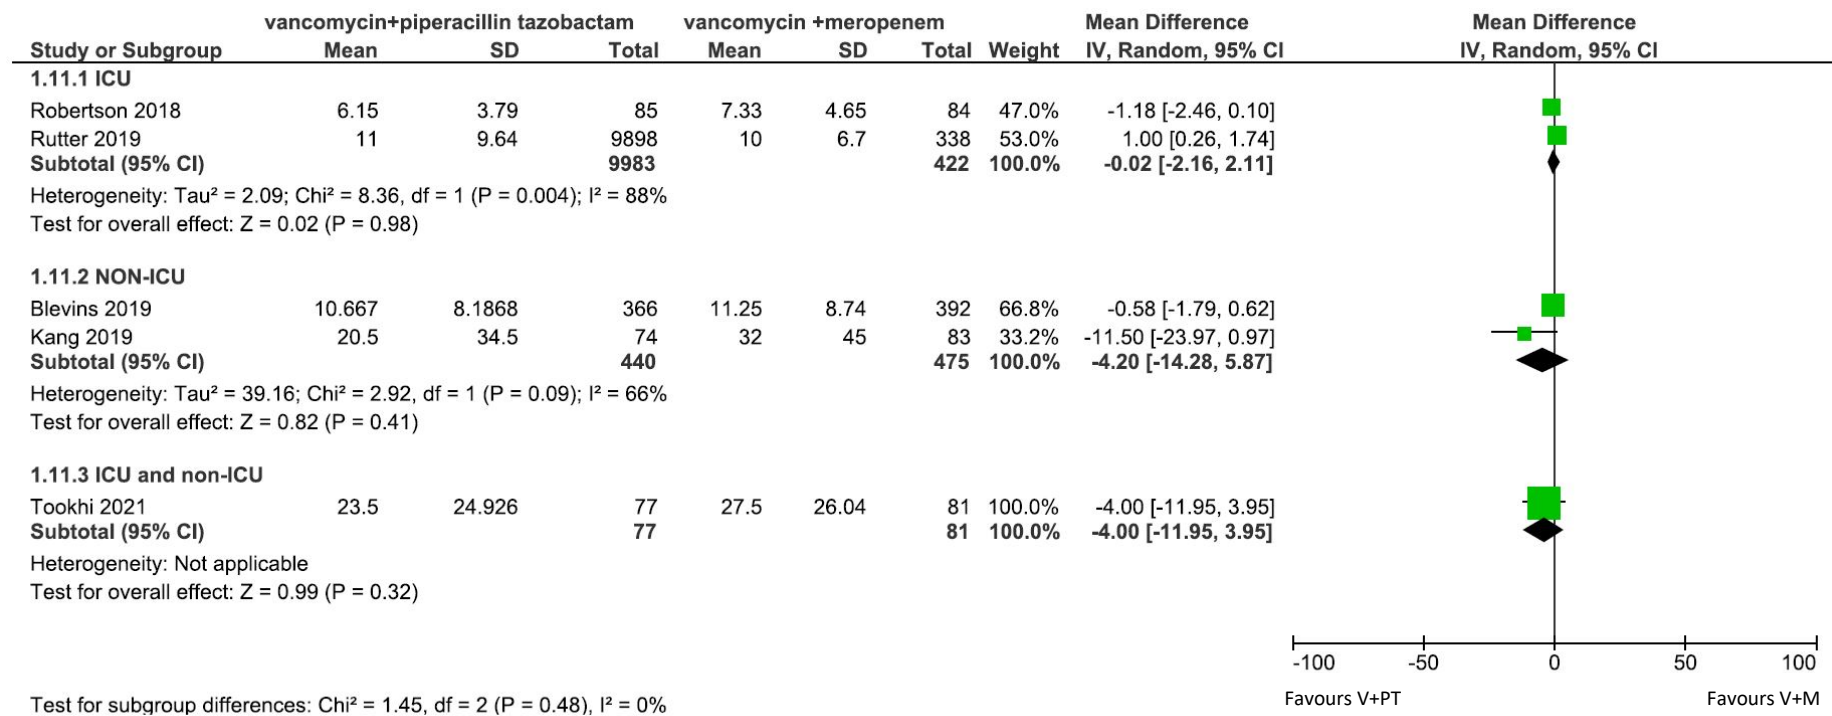

**Figure S4.** Length of stay (LOS) in hospital based on clinical setting.

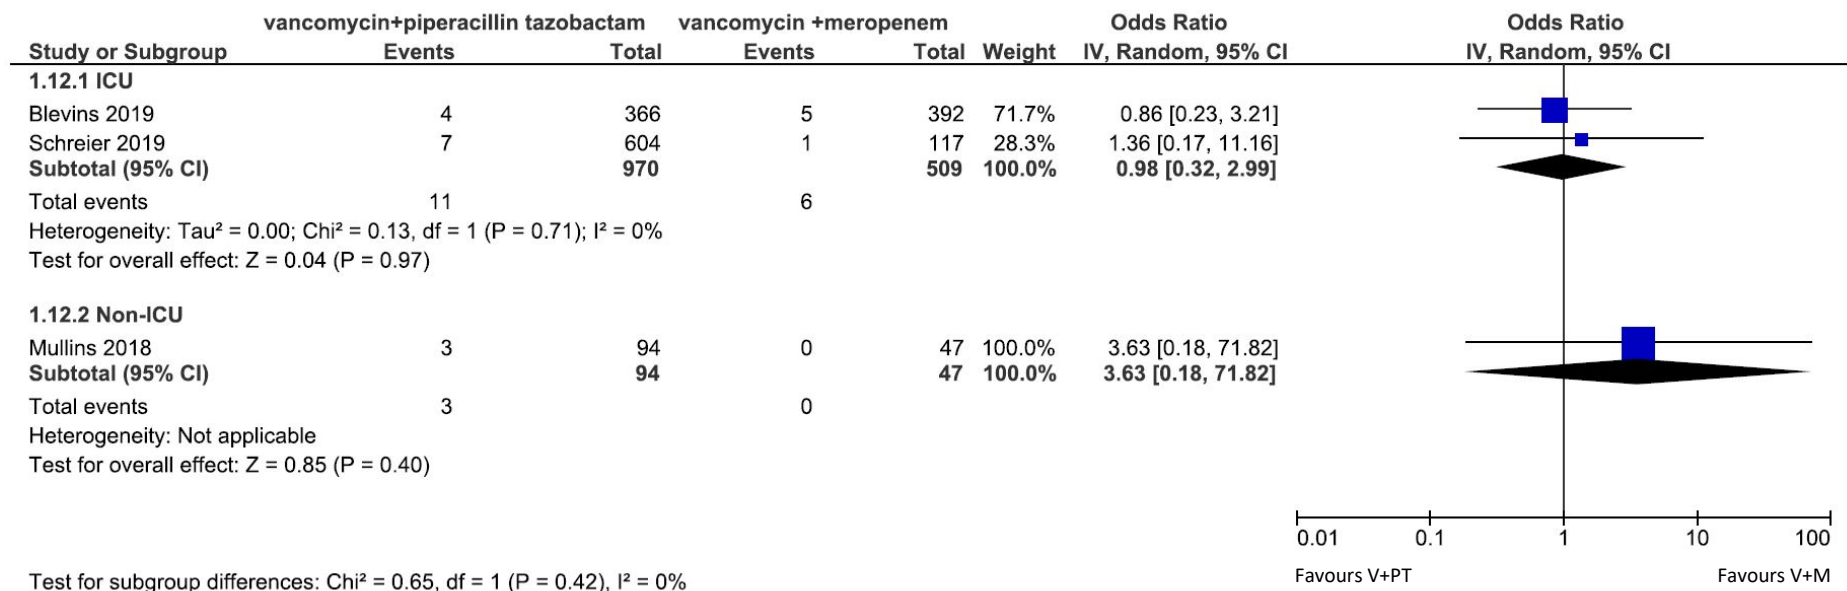

**Figure S5.** Renal replacement therapy (RRT) based on clinical setting.

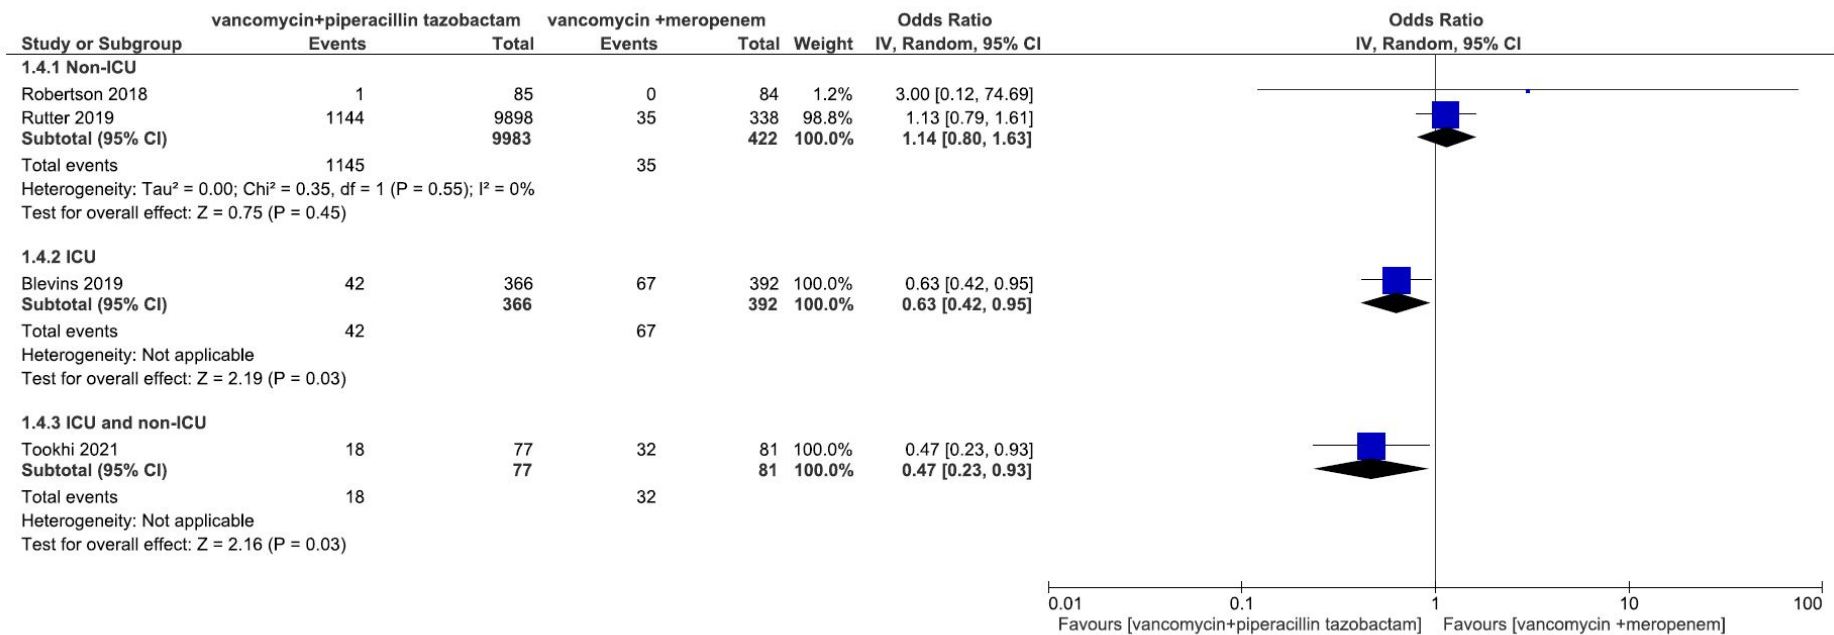

**Figure S6.** Mortality based on clinical setting.
